# Supplementary material
Source: Springer Nature journal article supplement (https://www.springermedizin.de/resource/supplementary/12889_2011_3330_MOESM2_ESM.pdf/9488804)
Supplement: MOESM2 [file 9488804]

**158 culture positive TB case folders**

- ↓
- 83 folders: no documentation of contacts

**75 folders had documentation of contacts (191 contacts in total)**

- ↓
- 8 folders: documentation of contact names, but without age (18 contacts)
  - 9 folders: documentation of the following: “no contacts < 5yrs”
  - 29 folders: documentation of contacts >5yrs (69 contacts) combined with contacts without documentation of age (7 contacts), but no contacts < 5yrs

**29 folders had documentation of contacts < 5yrs (37 contacts) combined with contacts >5yrs (45 contacts) and contacts without documentation of age (15 contacts)**

- ↓
- 9 folders: documentation of names without surnames (11 contacts < 5yrs of age)

**20 folders had documentation of names and surnames\* (26 contacts < 5yrs of age)**

- ↓
- 20 contacts < 5yrs: no individual clinic folders identified

**6 contacts < 5yrs: individual clinic folders identified**

↓  
**0 screened for TB**

↓  
**1 screened for TB and initiated IPT according to individual adult TB folder**

*\*If the surname was not documented, but it was indicated that the child was the son or daughter of the adult TB case, the surname of the adult TB case was taken as the surname of the child*
